# Supplementary material for: Lena Delta hydrology and geochemistry: long-term hydrological data and recent field observations
Source: Copernicus journal article supplement (doi:10.5194/bg-12-345-2015), 2015-01-19
Supplement: Supplementary file 1 [file Supplement descriptions.pdf › Supplement/Supplement descriptions.pdf]

**Supplement 1.** Sediment stream from an alas lake on an ice complex.

**Supplement 2.** Dangerous flood in the Lena River delta (film by O. Volkova).
