# Supplementary material for: Lena Delta hydrology and geochemistry: long-term hydrological data and recent field observations
Source: Copernicus journal article supplement (doi:10.5194/bg-12-345-2015), 2015-01-19
Supplement: Supplementary file 2 [file bg-12-345-2015-supplement-cover-letter.pdf › bg-12-345-2015-supplement-cover-letter.pdf]

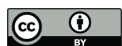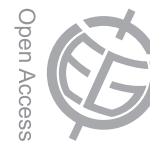

## *Supplement of*

# **Lena Delta hydrology and geochemistry: long-term hydrological data and recent field observations**

**I. Fedorova et al.**

*Correspondence to:* I. Fedorova (umnichka@mail.ru)

- [bg-12-345-2015-supplement-cover-letter.pdf](#)
- Supplement
  - Supplement 1.AVI
  - Supplement 2.MOV
  - Supplement descriptions.pdf
